# Supplementary material
Source: MDPI journal article supplement (https://www.mdpi.com/2410-3888/8/8/411)
Supplement: s1 [file s1]

# Current and Historical Genetic Variability of Native Brown Trout Populations in a Southern Alpine Ecosystem: Implications for Future Management

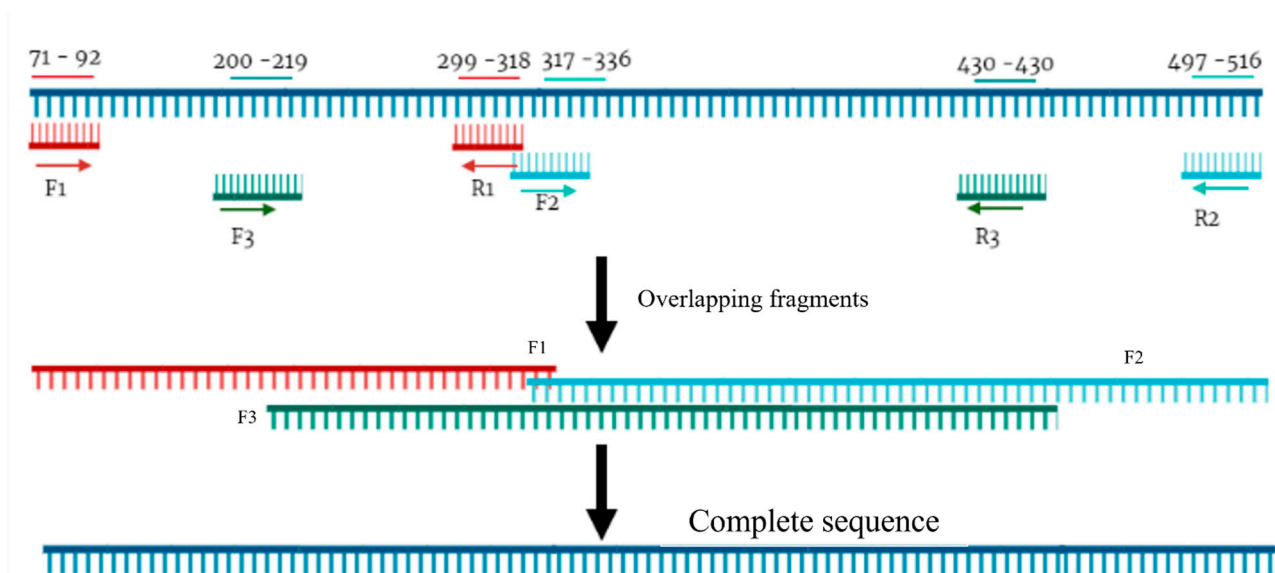

**Figure S1.** schematic representation of the new designed primer pairs to amplify three smaller overlapping fragments. Nucleotide positions refer to the fragment of CR mtDNA 450 bp length amplified with the primer pairs L15998-PRO and HDL-C1 [30].

**Table S2.** Details of new primers designed to amplify three smaller overlapping fragments (F1, F2, F3), methods three pieces" (cf Figure S1). Nucleotide positions refer to the fragment of CR mtDNA 450 bp length amplified with the primer pairs L15998-PRO and HDL-C1 [30].

| Name         | Sequence (5'→3')       | Length | Start | End | T <sub>m</sub> | Pairs with  |
|--------------|------------------------|--------|-------|-----|----------------|-------------|
| TruttaCR_F1  | ARTGTTGTACCTTGCTAACDCA | 22     | 71    | 92  | 59.56          | TruttaCR_R1 |
| TruttaCR_R1  | GCCCGTGTTAYNTGGAGTTT   | 20     | 318   | 299 | 60.25          | TruttaCR_F1 |
| Product (bp) | 248                    |        |       |     |                |             |
| TruttaCR_F2  | GCTCCGTCTTTACCCACCAA   | 20     | 317   | 336 | 59.96          | TruttaCR_R2 |
| TruttaCR_R2  | TACATTCGGCTTTCAGGGGG   | 20     | 516   | 497 | 59.75          | TruttaCR_F2 |
| Product (bp) | 200                    |        |       |     |                |             |
| TruttaCR_F3  | ACCCCTCATACATCAGCACT   | 20     | 200   | 219 | 58.11          | TruttaCR_R3 |
| TruttaCR_R3  | AYTTCACGAGATGCYYCCTA   | 20     | 449   | 430 | 58.54          | TruttaCR_F3 |
| Product (bp) | 250                    |        |       |     |                |             |

**Table S3.** Genbank references of *Salmo trutta* complex sequences used in this study for the phylogenetic analysis and parsimony network reconstruction. For each sequence evolutionary lineage based on the mitochondrial control region (D-Loop), name of the haplotype deposited in Genbank (GenBank), accession number at GenBank database (Acc. Num.) and source are indicated.

| Lineage            | GenBank   | Acc. Num. | Source     |
|--------------------|-----------|-----------|------------|
| Atlantic           | ATcs1     | AF273086  | [46,53,54] |
| Atlantic           | ATcs2     | AF273087  | [46]       |
| Atlantic           | ATcs3     | AF274574  | [46]       |
| Atlantic           | ATcs4     | AF274575  | [46]       |
| Atlantic           | ATSic     | JF297974  | [7]        |
| Atlantic           | AT-Tyrrh1 | KX450263  | [54]       |
| Atlantic           | ATcs14    | EF530476  | [53]       |
| Atlantic           | ATcs37    | EF530499  | [53]       |
| Atlantic           | ATcs38    | EF530500  | [53]       |
| Atlantic           | ATcs50    | EF530510  | [53]       |
| Atlantic           | ATcs51    | EF530511  | [53]       |
| Atlantic           | ATcs52    | EF530512  | [53]       |
| Adriatic           | ADcs1     | AY836330  | [31]       |
| Adriatic           | ADporh1   | MK448034  | [34]       |
| Adriatic           | ADcs15    | AY836344  | [31]       |
| Adriatic           | AdcsTi1   | KU667314  | [55]       |
| Adriatic           | AD-Z1     | DQ381565  | [56]       |
| Adriatic           | AD-Tyrrh1 | KX450257  | [54]       |
| Adriatic           | AD-Tyrrh2 | KX450258  | [54]       |
| Adriatic           | AD-Tyrrh3 | KX450259  | [54]       |
| Adriatic           | AD-Tyrrh4 | KX450260  | [54]       |
| Adriatic           | AD-Tyrrh5 | KX450261  | [54]       |
| Adriatic           | AD-Tyrrh6 | KX450262  | [54]       |
| Adriatic           | ADcr2     | MK184916  | [57]       |
| Adriatic           | ADcr3     | MK184921  | [57]       |
| Adriatic           | ADcr4     | MK184826  | [57]       |
| Adriatic           | ADcr5     | MK184935  | [57]       |
| Adriatic           | ADcr6     | MK184943  | [57]       |
| Adriatic           | ADrh-1    | MK948035  | [34]       |
| Adriatic           | ADK1      | JX846932  | [58]       |
| Mediterranean      | Mecs1     | AY836350  | [31]       |
| Mediterranean      | MEcs4     | AY836353  | [31]       |
| Mediterranean      | MEcs6     | AY836355  | [31]       |
| Mediterranean      | MEcs7     | AY836356  | [31]       |
| Mediterranean      | MEcs8     | AY836357  | [31,34]    |
| Mediterranean      | Mecs15    | AY836364  | [31]       |
| Mediterranean      | Mecs25    | MG970274  | [59]       |
| Mediterranean      | MEcr1     | MK184945  | [57]       |
| Mediterranean      | T19866    | MK184949  | [57]       |
| <i>marmoratus</i>  | Ma2a      | DQ841189  | [60]       |
| <i>marmoratus</i>  | Ma2b      | DQ841190  | [60]       |
| <i>marmoratus</i>  | Ma2C      | JQ582461  | [60]       |
| <i>marmoratus</i>  | Ma        | MW251444  | [61]       |
| Danubian           | Da1f      | MK675073  | [47]       |
| Danubian           | Da1g      | MK675074  | [47]       |
| Danubian           | DA3       | AY185571  | [62]       |
| Danubian           | DA9       | AY185572  | [62]       |
| Danubian           | DA22      | AF321993  | [63]       |
| <i>Salmo salar</i> | Leguer2   | GQ376149  | [64]       |

\* Sequence used only for phylogenetic analysis.

**Table S4.** Sampled populations: genetic population identification (ID), stream, basin, sub-basin, geographic coordinates and number of samples (N) are indicated. (cf Figure 1).

| ID | Stream             | Basin        | Sub-basin        | Geographic coordinates (N-E) | N  |
|----|--------------------|--------------|------------------|------------------------------|----|
| A  | Marianna           | Ticino       | Boesio           | 45°91'83"; 8°71'36"          | 20 |
| C  | Ripa               | Dora Riparia | -                | 44°53'10"; 6°57'15"          | 10 |
| D  | Valle di Rezzago   | Lambro       | -                | 45°86'36"; 9°24'55"          | 20 |
| E  | Senagra            | Adda         | -                | 46°02'26"; 9°12'27"          | 20 |
| F  | Caldone            | Adda         | -                | 45°87'52"; 9°49'52"          | 20 |
| G  | Valle Merla        | Adda         | -                | 46°11'79"; 9°36'29"          | 20 |
| H  | Acqualina          | Adda         | Serio            | 45°94'94"; 9°85'82"          | 20 |
| I  | Vò                 | Oglio        | Dezzo            | 46°03'70"; 10°13'56"         | 10 |
| L  | Valle della Pietra | Adda         | Bitto            | 46°05'18"; 9°54'92"          | 20 |
| M  | Lella              | Staffora     | -                | 44°78'57"; 9°19'19"          | 20 |
| N  | Avagnone           | Trebbia      | -                | 44°68'86"; 9°30'25"          | 10 |
| O  | Rio Freddo         | Tanaro       | Stura di Demonte | 44°14'37"; 7°10'29"          | 10 |
| Q  | Grigna             | Oglio        | -                | 45°85'08"; 10°37'74"         | 7  |
| R  | Allione            | Oglio        | -                | 46°01'10"; 10°14'21"         | 12 |
| S  | Valle di Vesta     | Mincio       | Toscolano        | 45°72'48"; 10°60'81"         | 5  |
